# Supplementary material for: Probiotics and rifaximin for the prevention of travelers’ diarrhea: A systematic review and network meta-analysis
Source: PubMed Central journal article supplement — Medicine (Baltimore). 2022 Oct 7;101(40):e30921. doi: 10.1097/MD.0000000000030921 (PMC9542755; doi:10.1097/md.0000000000030921), 2022-10-07
Supplement: medi-101-e30921-s001.pdf [file medi-101-e30921-s001.pdf]

## Supplementary Figure 1. Risk of bias plot

| Study ID                | Randomization process | Deviations from intended intervention | Missing outcome data | Measurement of the outcome | Selection of the reported result | Overall |                   |
|-------------------------|-----------------------|---------------------------------------|----------------------|----------------------------|----------------------------------|---------|-------------------|
| Armstrong 2010          | +                     | +                                     | +                    | +                          | +                                | +       | Low risk of bias  |
| Black 1989              | +                     | ?                                     | ?                    | +                          | +                                | ?       | Some concerns     |
| Briand 2006             | +                     | +                                     | +                    | +                          | +                                | +       | High risk of bias |
| de dios Pozo-Olano 1978 | ?                     | ?                                     | +                    | +                          | +                                | ?       |                   |
| Drakoularakou 2010      | +                     | +                                     | +                    | +                          | +                                | +       |                   |
| Dupont 2005             | +                     | +                                     | +                    | ?                          | +                                | ?       |                   |
| Flores 2011             | +                     | +                                     | +                    | +                          | +                                | +       |                   |
| Hasle 2017              | +                     | +                                     | +                    | +                          | +                                | +       |                   |
| Hilton 1997             | +                     | ?                                     | ?                    | +                          | +                                | ?       |                   |
| Katellaris 1995         | ?                     | ?                                     | +                    | +                          | +                                | ?       |                   |
| Kollaritsch 1989        | +                     | ?                                     | ?                    | +                          | +                                | ?       |                   |
| Kollaritsch 1993        | +                     | +                                     | +                    | +                          | +                                | +       |                   |
| Krokowicz 2014          | +                     | +                                     | ?                    | ?                          | +                                | ?       |                   |
| Martinez-Sandoval 2010  | +                     | +                                     | +                    | +                          | +                                | +       |                   |
| Oksanen 1990            | +                     | ?                                     | ?                    | +                          | +                                | ?       |                   |
| Virk 2013               | +                     | +                                     | +                    | +                          | +                                | +       |                   |
| Zanger 2013             | +                     | +                                     | +                    | +                          | +                                | +       |                   |
